# Supplementary material
Source: PubMed Central journal article supplement (PMC3697690)
Supplement: JCM.00335-13_zjm999092647so1.pdf [file JCM.00335-13_zjm999092647so1.pdf]

1 **TABLE S1. Characteristics of 33 subjects classified as having prosthetic joint infection (PJI) who had negative sonicate fluid bacterial**  
 2 **PCR**

| Case number                                                                 | Hip or Knee | Criteria for PJI classification |           |             | ESR (mm/h) | CRP (mg/L) | Synovial fluid leukocyte count/ $\mu$ L (% neutrophils) | Other antecedent and/or relevant data                                                                                            | Antecedent antimicrobial therapy (within 28 days prior to index surgery) <sup>a</sup> | Number positive tissue cultures/ number tissues cultured, organism detected in tissue culture | Sonicate fluid culture isolate (CFU/plate) |
|-----------------------------------------------------------------------------|-------------|---------------------------------|-----------|-------------|------------|------------|---------------------------------------------------------|----------------------------------------------------------------------------------------------------------------------------------|---------------------------------------------------------------------------------------|-----------------------------------------------------------------------------------------------|--------------------------------------------|
|                                                                             |             | Acute inflammation              | Purulence | Sinus tract |            |            |                                                         |                                                                                                                                  |                                                                                       |                                                                                               |                                            |
| <b>Fungal PJI (not detected by bacterial PCR panel)</b>                     |             |                                 |           |             |            |            |                                                         |                                                                                                                                  |                                                                                       |                                                                                               |                                            |
| 236                                                                         | Knee        | -                               | +         | -           | 26         | ND         | 5772 (86)                                               | <i>Candida albicans</i> TKA infection, fluconazole chronic suppression                                                           | Fluconazole                                                                           | 3/3, <i>C. albicans</i>                                                                       | <i>C. albicans</i> (20-50)                 |
| 364                                                                         | Knee        | ND                              | +         | -           | 16         | 4          | ND                                                      | <i>Candida glabrata</i> TKA infection (synovial fluid culture - <i>C. glabrata</i> )                                             | No                                                                                    | 1/4, SCN                                                                                      | -                                          |
| <b>PJI caused by unusual bacteria (not detected by bacterial PCR panel)</b> |             |                                 |           |             |            |            |                                                         |                                                                                                                                  |                                                                                       |                                                                                               |                                            |
| 164                                                                         | Knee        | +                               | +         | -           | 67         | 56         | 25064 (86)                                              | Waldenström's macroglobulinemia, alcoholism                                                                                      | No                                                                                    | 3/3, <i>Capnocytophaga canimorsus</i>                                                         | <i>C. canimorsus</i> (51-100)              |
| 200                                                                         | Hip         | +                               | -         | -           | 85         | 47.7       | ND                                                      | Diabetes mellitus                                                                                                                | No                                                                                    | 7/7, <i>Mycobacterium abscessus</i>                                                           | -                                          |
| <b>PJI with negative or not significant tissue cultures</b>                 |             |                                 |           |             |            |            |                                                         |                                                                                                                                  |                                                                                       |                                                                                               |                                            |
| 52 <sup>b</sup>                                                             | Hip         | +                               | -         | -           | 14         | <3         | ND                                                      | Hip dysplasia, degenerative change. No prolonged antibiotic therapy given after index surgery. Well at follow-up 5 months later. | No                                                                                    | 0/5                                                                                           | -                                          |
| 53 <sup>b</sup>                                                             | Hip         | +                               | -         | -           | 9          | 5          | ND                                                      | Antibiotic therapy for 2 weeks after index surgery. Well at follow-up 2 years later                                              | No                                                                                    | 0/3                                                                                           | -                                          |
| 142                                                                         | Hip         | +                               | -         | -           | 4          | 6          | ND                                                      | Prior <i>Streptococcus</i>                                                                                                       | Cephalexin                                                                            | 0/4                                                                                           | -                                          |

|     |      |    |   |   |    |       |            |                                                                                                         |               | <i>agalactiae</i> THA infection |   |  |
|-----|------|----|---|---|----|-------|------------|---------------------------------------------------------------------------------------------------------|---------------|---------------------------------|---|--|
| 148 | Hip  | +  | - | - | ND | ND    | ND         | Rheumatoid arthritis                                                                                    | No            | 1/3, SCN                        | - |  |
| 155 | Knee | +  | - | - | 10 | 3     | 100 (88)   | Prior left TKA infection with cellulitis and abscess                                                    | No            | 0/7                             | - |  |
| 157 | Hip  | -  | - | + | ND | ND    | ND         | Prior removal of painful cables, complicated by cellulitis                                              | Cephalexin    | 0/5                             | - |  |
| 181 | Knee | -  | + | - | 30 | <3    | 52 (38)    |                                                                                                         | Ciprofloxacin | 0/3                             | - |  |
| 195 | Hip  | +  | + | - | 25 | 20.7  | ND         |                                                                                                         | No            | 0/5                             | - |  |
| 231 | Knee | +  | + | - | 10 | 11.8  | ND         | Two prior TKA infections. Rifampin plus minocycline suppression until one month prior to index surgery. | No            | 0/4                             | - |  |
| 242 | Knee | -  | + | - | 22 | 8.7   | 23400 (75) | Recurrent TKA infection (synovial fluid culture – SCN)                                                  | Minocycline   | 0/3                             | - |  |
| 247 | Knee | -  | + | - | 25 | 3.2   | ND         | Two prior two-stage exchanges. Chronic minocycline until one month prior to index surgery.              | No            | 0/3                             | - |  |
| 258 | Knee | -  | + | + | 36 | 33.1  | 1404 (65)  |                                                                                                         | No            | 0/6                             | - |  |
| 292 | Knee | +  | + | - | 51 | 33.1  | 18512 (64) |                                                                                                         | No            | 0/3                             | - |  |
| 295 | Knee | -  | + | - | 29 | 16.6  | 6916 (78)  | Undifferentiated connective tissue disease                                                              | No            | 1/6, <i>P. acnes</i>            | - |  |
| 318 | Hip  | ND | + | + | 17 | 106.3 | ND         | Prior THA infections                                                                                    | No            | 1/3, <i>Coryne. sp</i>          | - |  |
| 333 | Knee | +  | - | - | 37 | 11.5  | ND         |                                                                                                         | No            | 0/7                             | - |  |
| 349 | Knee | -  | + | - | 15 | <3    | 52 (3)     |                                                                                                         | No            | 0/4                             | - |  |
| 366 | Knee | +  | - | - | 19 | 19.2  | 49608 (77) |                                                                                                         | No            | 1/3, VGS                        | - |  |
| 399 | Knee | -  | + | - | 26 | 15.8  | 16226 (85) |                                                                                                         | No            | 0/3                             | - |  |
| 426 | Knee | -  | + | - | 32 | 9.5   | 9115 (26)  |                                                                                                         | No            | 0/4                             | - |  |
| 431 | Hip  | -  | + | - | 24 | 5     | 20517 (ND) |                                                                                                         | No            | 0/3                             | - |  |

|                                          |      |    |   |   |     |       |            |                                                                                                           |            |                                           |                         |
|------------------------------------------|------|----|---|---|-----|-------|------------|-----------------------------------------------------------------------------------------------------------|------------|-------------------------------------------|-------------------------|
| 435                                      | Knee | +  | + | - | 110 | 100.8 | 48130 (79) |                                                                                                           | No         | 1/5, <i>P. acnes</i>                      | -                       |
| 445                                      | Hip  | +  | - | - | 10  | 13.6  | 4872 (95)  |                                                                                                           | No         | 0/5                                       | -                       |
| 449                                      | Hip  | ND | - | + | 21  | 16.1  | ND         | Persistently draining wound after THA reimplantation 3 weeks prior to index surgery                       | No         | 0/4                                       | -                       |
| <b>PJI with positive tissue cultures</b> |      |    |   |   |     |       |            |                                                                                                           |            |                                           |                         |
| 211                                      | Hip  | ND | + | - | 65  | 199.1 | ND         | <i>S. aureus</i> THA infection 3 months prior to index surgery                                            | Cefazolin  | 4/6, <i>S. aureus</i>                     | <i>S. aureus</i> (>100) |
| 259                                      | Hip  | ND | + | - | 25  | 6.8   | ND         | Prior <i>S. aureus</i> THA infection. Chronic minocycline until more than 1 month prior to index surgery. | No         | 3/6, <i>S. aureus</i>                     | <i>S. aureus</i> (>100) |
| 298                                      | Knee | -  | + | - | 6   | <3    | ND         | Prior <i>S. aureus</i> abscess                                                                            | No         | 4/5, <i>S. aureus</i>                     | -                       |
| 369                                      | Knee | +  | - | + | 4   | 70    | 52 (52)    | Prior TKA infections                                                                                      | Cefazolin  | 2/3, <i>S. aureus</i> , <i>Coryne. sp</i> | -                       |
| 425                                      | Knee | +  | + | - | 38  | 11    | ND         |                                                                                                           | Cephalexin | 3/3, <i>S. aureus</i>                     | <i>S. aureus</i> (>100) |

3 <sup>a</sup>14/43 (32.6%) subjects with PJI and negative tissue cultures had received antimicrobics. 13/39 (33.5%) subjects with PJI and negative sonicate fluid cultures had received  
4 antimicrobial therapy. For 8/13, at least one PCR assay was positive (subjects 74, 110, 214, 226, 250, 286, 352 and 379). 8/33 (24.2%) with PJI and negative PCRs had  
5 received antimicrobial therapy.

6 <sup>b</sup>These two cases were reviewed by an infectious diseases physician who considered them not to represent PJI.

7 ND, not done; THA, total hip arthroplasty; TKA, total knee arthroplasty; SCN, coagulase-negative *Staphylococcus* species; *Coryne. sp.*, Gram-positive bacillus resembling  
8 *Corynebacterium* species; VGS, viridans group *Streptococcus* species; +, positive; -, negative

9

TABLE S2. Discordant results between sonicate fluid PCR and culture

| Case number #                              | PJI<br>(yes, no) | Antimicrobial treatment<br>within 28 days prior to<br>index surgery | Number positive<br>tissue cultures/<br>number tissues<br>cultured, organism<br>detected in tissue<br>culture | Synovial fluid<br>culture isolate | Sonicate fluid culture<br>isolate (CFU/plate)   | Assay result           |    |
|--------------------------------------------|------------------|---------------------------------------------------------------------|--------------------------------------------------------------------------------------------------------------|-----------------------------------|-------------------------------------------------|------------------------|----|
| <b><i>Staphylococcus</i> assay</b>         |                  |                                                                     |                                                                                                              |                                   |                                                 |                        | 11 |
| 74                                         | Yes              | Vancomycin                                                          | 4/5, <i>Staphylococcus aureus</i>                                                                            | <i>S. aureus</i>                  | -                                               | + ( <i>S. aureus</i> ) | 12 |
| 110 <sup>a</sup>                           | Yes              | Oxacillin                                                           | 3/5, SCN                                                                                                     | ND                                | -                                               | + ( <i>S. aureus</i> ) | 13 |
| 226                                        | Yes              | TMP-SMX, levofloxacin                                               | 2/4, SCN                                                                                                     | ND                                | -                                               | + (SCN) <sup>d</sup>   | 14 |
| 250 <sup>a</sup>                           | Yes              | Fusidic acid                                                        | 0/5                                                                                                          | ND                                | -                                               | + (SCN) <sup>b</sup>   | 15 |
| 352                                        | Yes              | Amoxicillin-clavulanate                                             | 2/3, SCN                                                                                                     | SCN                               | -                                               | + (SCN)                | 16 |
| 430                                        | Yes              | No                                                                  | 2/3, SCN                                                                                                     | SCN                               | -                                               | + (SCN)                | 17 |
| 38                                         | No <sup>c</sup>  | No                                                                  | 1/2, <i>Coryne. sp.</i>                                                                                      | -                                 | <i>S. aureus</i> (>100)                         | -                      | 18 |
| 211                                        | Yes              | Cefazolin                                                           | 4/6, <i>S. aureus</i>                                                                                        | ND                                | <i>S. aureus</i> (>100)                         | - <sup>d</sup>         | 19 |
| 259                                        | Yes              | No                                                                  | 3/6, <i>S. aureus</i>                                                                                        | SCN                               | <i>S. aureus</i> (>100)                         | -                      | 20 |
| 342                                        | Yes              | Vancomycin, rifampin                                                | 0/3                                                                                                          | SCN                               | SCN (51-100)                                    | - <sup>d, e</sup>      | 21 |
| 425                                        | Yes              | Cephalexin                                                          | 3/3, <i>S. aureus</i>                                                                                        | <i>S. aureus</i>                  | <i>S. aureus</i> (>100)                         | - <sup>d</sup>         | 22 |
| 428                                        | Yes              | No                                                                  | 1/4, SCN                                                                                                     | <i>Enterococcus sp.</i>           | <i>Enterococcus sp.</i> (51-100), SCN (51-100)  | - <sup>f</sup>         | 23 |
| <b><i>Streptococcus</i> assay</b>          |                  |                                                                     |                                                                                                              |                                   |                                                 |                        | 24 |
| 214                                        | Yes              | Penicillin G, ceftriaxone                                           | 0/5                                                                                                          | <i>S. agalactiae</i>              | -                                               | + <sup>g</sup>         | 25 |
| 280 <sup>a</sup>                           | Yes              | No                                                                  | 1/7, SCN                                                                                                     | -                                 | -                                               | +                      | 26 |
| 299                                        | No <sup>c</sup>  | Vancomycin                                                          | 0/3                                                                                                          | ND                                | -                                               | +                      | 27 |
| 397 <sup>a</sup>                           | No               | Penicillin, clindamycin                                             | 0/5                                                                                                          | ND                                | -                                               | + <sup>g</sup>         | 28 |
| <b>Enterobacteriaceae assay</b>            |                  |                                                                     |                                                                                                              |                                   |                                                 |                        | 29 |
| 175*                                       | Yes              | TMP-SMX                                                             | 5/5, <i>S. aureus</i> , 2/5 <i>Fingoldia magna</i> , <i>Coryne. sp.</i>                                      | <i>S. aureus</i>                  | <i>S. aureus</i> (>100), <i>F. magna</i> (>100) | + <sup>e, h</sup>      | 30 |
| 217                                        | Yes              | No                                                                  | 2/9, <i>Escherichia coli</i>                                                                                 | ND                                | -                                               | +                      | 31 |
| 245                                        | Yes              | TMP-SMX, rifampin                                                   | 3/5, <i>S. aureus</i> , 1/5 <i>Klebsiella pneumoniae</i>                                                     | ND                                | <i>S. aureus</i> (>100)                         | + <sup>h</sup>         | 32 |
| 321                                        | No <sup>c</sup>  | No                                                                  | 0/3                                                                                                          | -                                 | -                                               | +                      | 33 |
| 379 <sup>a</sup>                           | Yes              | Cefazolin, vancomycin                                               | 0/7                                                                                                          | -                                 | -                                               | +                      | 34 |
| <b><i>Pseudomonas aeruginosa</i> assay</b> |                  |                                                                     |                                                                                                              |                                   |                                                 |                        | 35 |
| 286                                        | Yes              | Ceftazidime                                                         | 3/3 <i>P. aeruginosa</i>                                                                                     | -                                 | -                                               | +                      | 36 |
| <b>No specific assay</b>                   |                  |                                                                     |                                                                                                              |                                   |                                                 |                        | 37 |
| 164                                        | Yes              | No                                                                  | 3/3, <i>Capnocytophaga canimorsus</i>                                                                        | <i>C. canimorsus</i>              | <i>C. canimorsus</i>                            | NA                     | 38 |
| 236                                        | Yes              | Fluconazole                                                         | 3/3, <i>Candida albicans</i>                                                                                 | <i>C. albicans</i>                | <i>C. albicans</i>                              | NA                     | 39 |

31 <sup>a</sup>110: *S. aureus* infection of the same total knee arthroplasty and *S. aureus* bacteremia 2 months prior; 250: SCN infection of the same total hip arthroplasty 17 months prior  
32 with two prior irrigation/debridement procedures; 280: Total knee arthroplasty infection with *Streptococcus sanguis* septic native contralateral hip with psoas abscess nine  
33 months prior; 397: Chronic total hip arthroplasty infection with  $\beta$ -hemolytic *Streptococcus* species nine months prior; 175, 379: No prior history of Enterobacteriaceae  
34 infection.

35 <sup>b</sup>Positive with *Propionibacterium* assay.

36 <sup>c</sup>38: Antibiotic therapy given only 2 weeks after one-stage exchange. Well at follow-up 1 year later; 299: No antibiotic therapy given after index surgery. Well at follow-up 2  
37 years later; 321: No antibiotic therapy given after index surgery. Well at follow-up 2 years later.

38 <sup>d</sup>Positive with repeat testing (211: *S. aureus*; 342, 425: SCN).

39 <sup>e</sup>Positive with Gram-positive anaerobic cocci assay.

40 <sup>f</sup>Positive with *Enterococcus* assay.

41 <sup>g</sup>Tm compatible with *Streptococcus agalactiae*.

42 <sup>h</sup>Positive with *Staphylococcus* assay.

43 SCN, coagulase-negative *Staphylococcus* species; ND, not done; TMP-SMX, trimethoprim-sulfamethoxazole; *Coryne. sp.*, Gram-positive bacillus resembling

44 *Corynebacterium* species; -, negative; +, positive; NA: not applicable.
